# Supplementary material for: Patterning, integration and characterisation of polymer optical oxygen sensors for microfluidic devices
Source: Royal Society of Chemistry journal article supplement (doi:10.1039/b801879k), 2008-01-01
Supplement: b801879k.pdf [file b801879k.pdf]

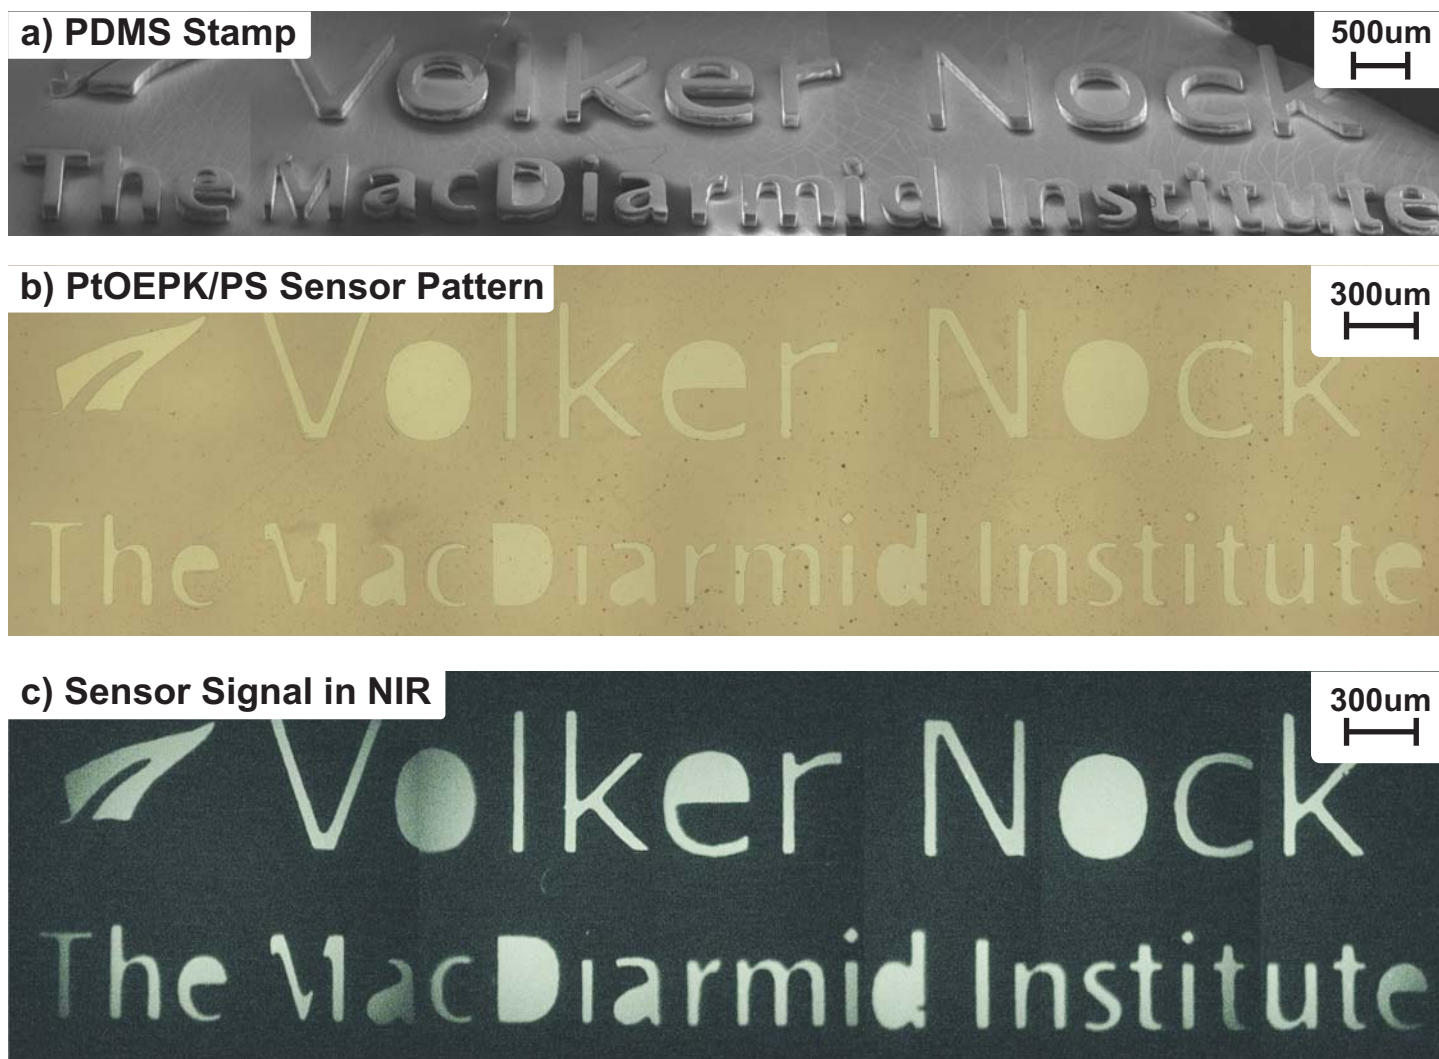

**Figure** Test pattern replicated in PtOEPK/PS by the fabrication process: (a) SEM micrograph of the PDMS stamp used as mask in the RIE step, (b) DIC image of the pattern in the PtOEPK/PS film after etching, and (c) fluorescent emission in the NIR from the same pattern under illumination with light of 590nm wavelength.
